# Supplementary material
Source: PubMed Central journal article supplement (PMC5462043)
Supplement: supp_pp.17.00301_PP2017-RA-00301D_Supplemental_Material.pdf [file supp_pp.17.00301_PP2017-RA-00301D_Supplemental_Material.pdf]

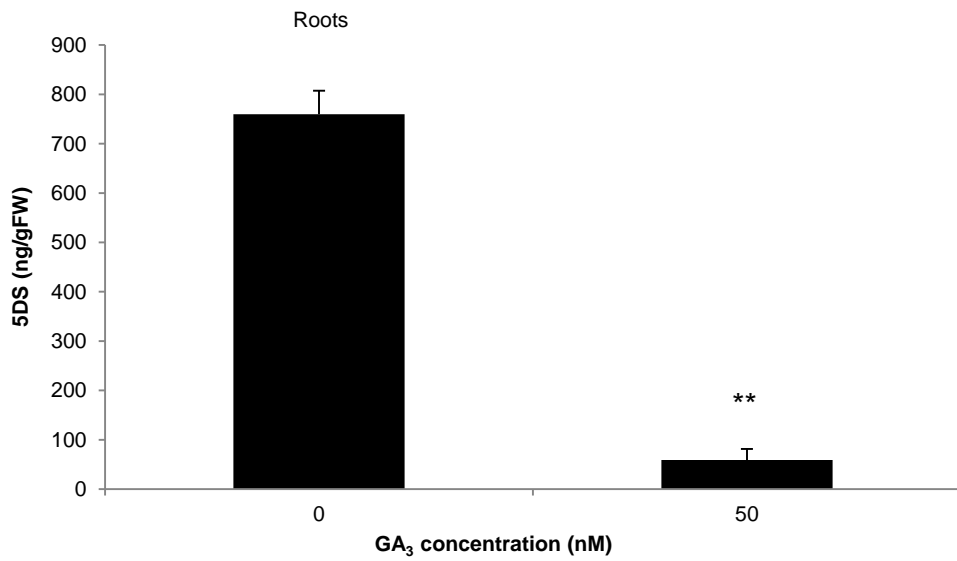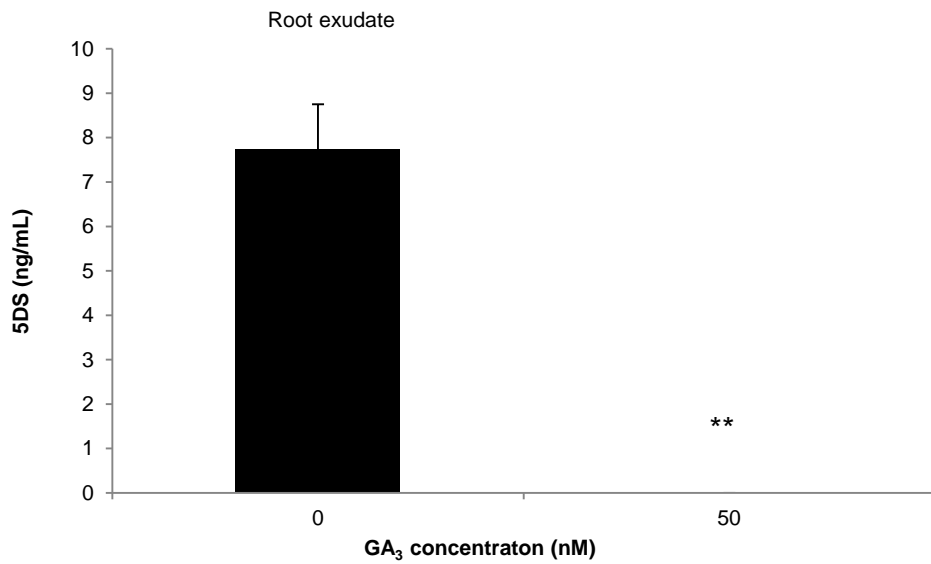

**Supplemental Fig. 1**

**Effect of GA<sub>3</sub> on SL levels of *Lotus japonicus* root culture.**

5DS levels in root exudates of GA<sub>3</sub>-treated root culture by LC-MS/MS. Columns marked with \*\* indicate significant differences (Student's *t*-test, *P* < 0.01)

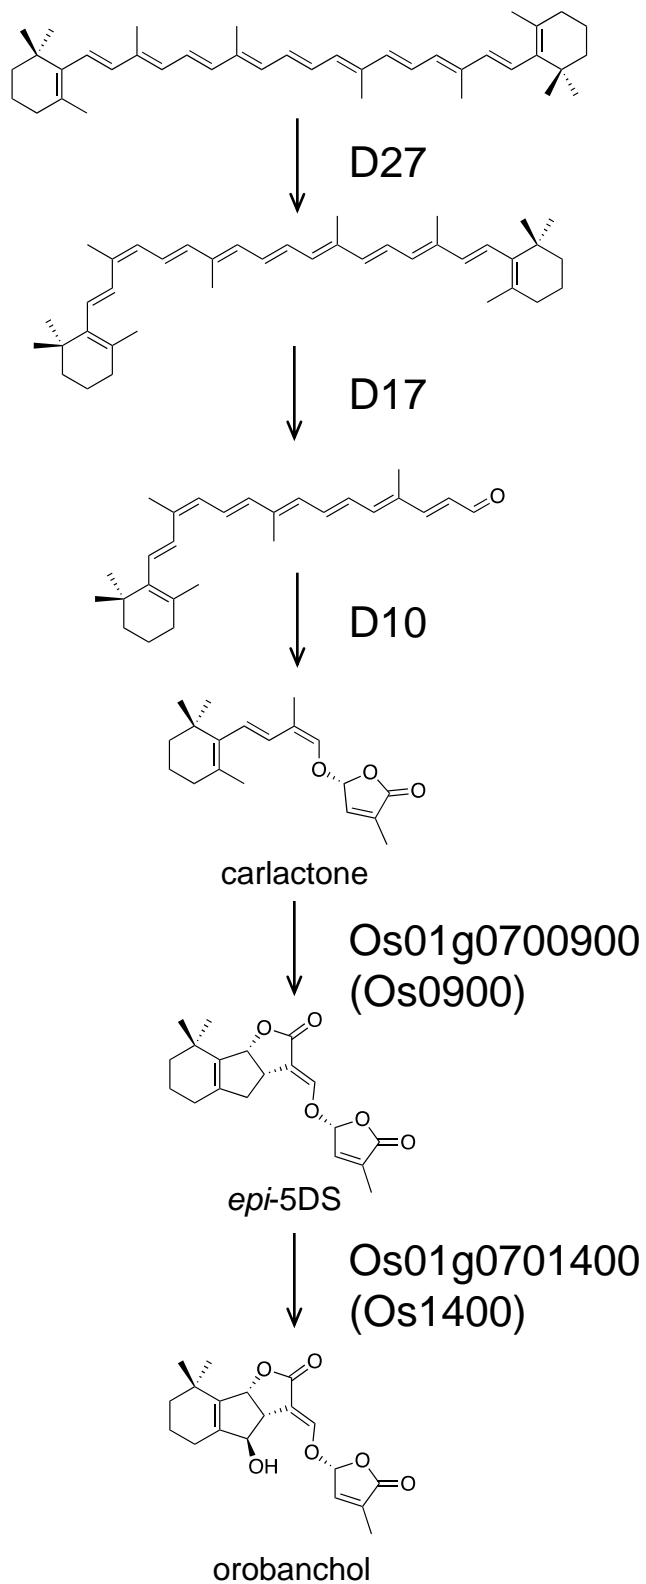

**Supplemental Fig. 2**  
SL biosynthesis pathway in rice

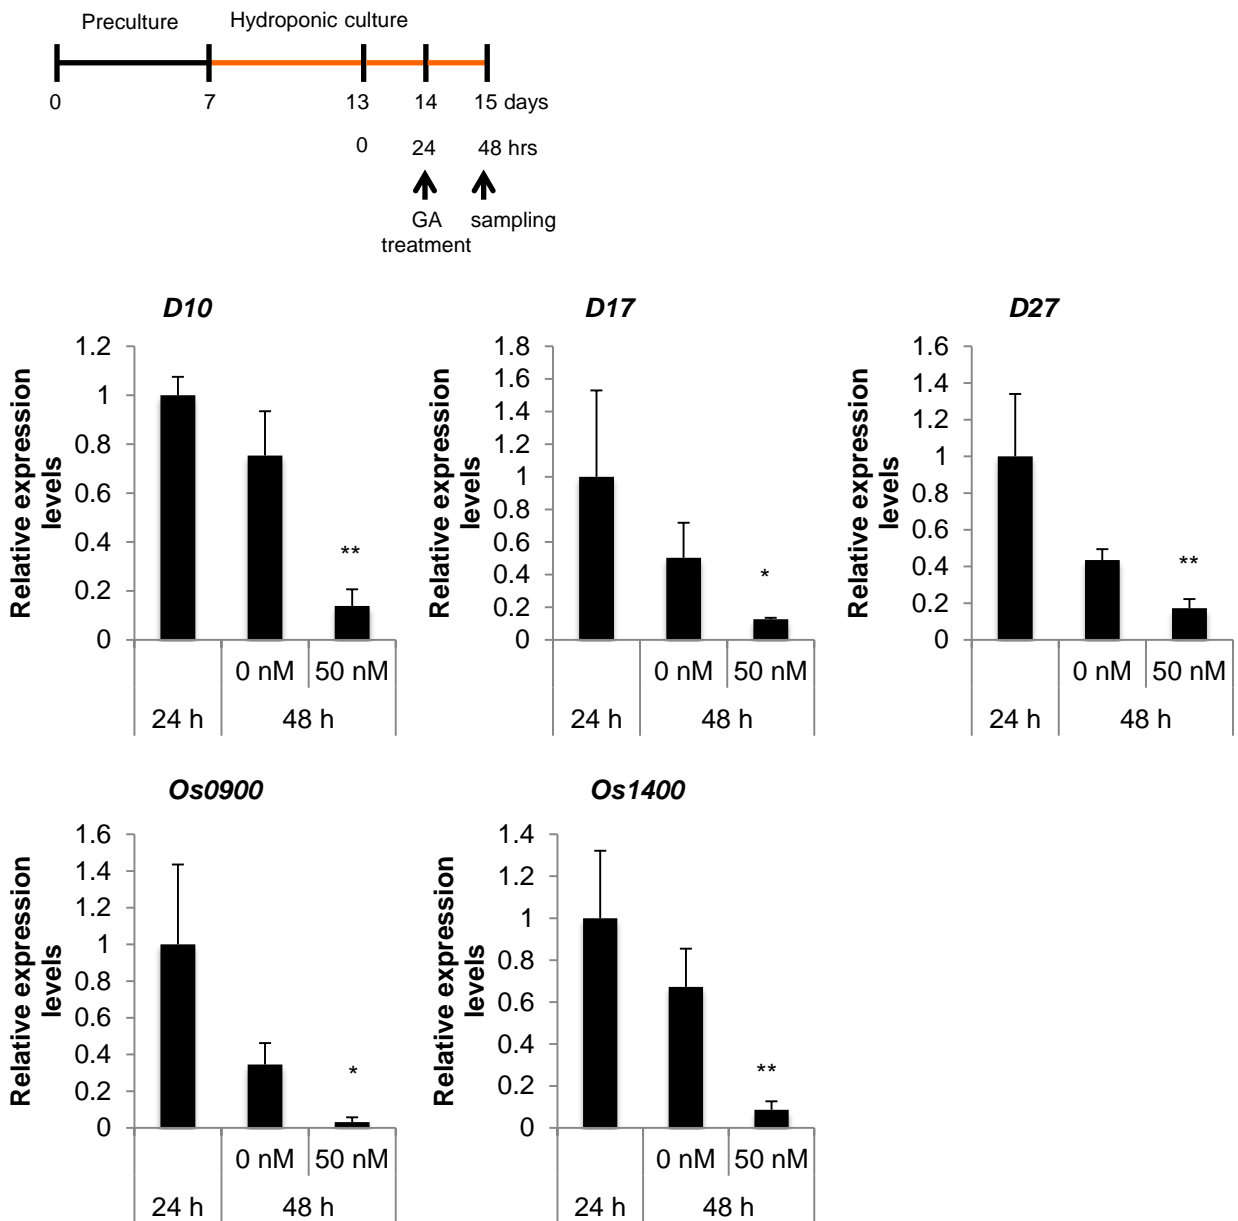

### Supplemental Fig. 3

#### Effects of GA on transcript levels of SL biosynthesis genes in roots.

A, Schematic diagram showing the experimental conditions. Orange bar indicates a hydroponic culture without Pi. We transferred rice seedlings into fresh media without GA<sub>3</sub> at day 13 and treated GA<sub>3</sub> at day 14. B, Transcript levels of SL biosynthesis genes in GA (50nM)-treated rice. Data are means  $\pm$  SD (n = 3). Columns marked with \* and \*\* indicate significant difference from 0 nM GA<sub>3</sub>-treated rice (*t*-test,  $P < 0.05$  and  $P < 0.01$ , respectively).

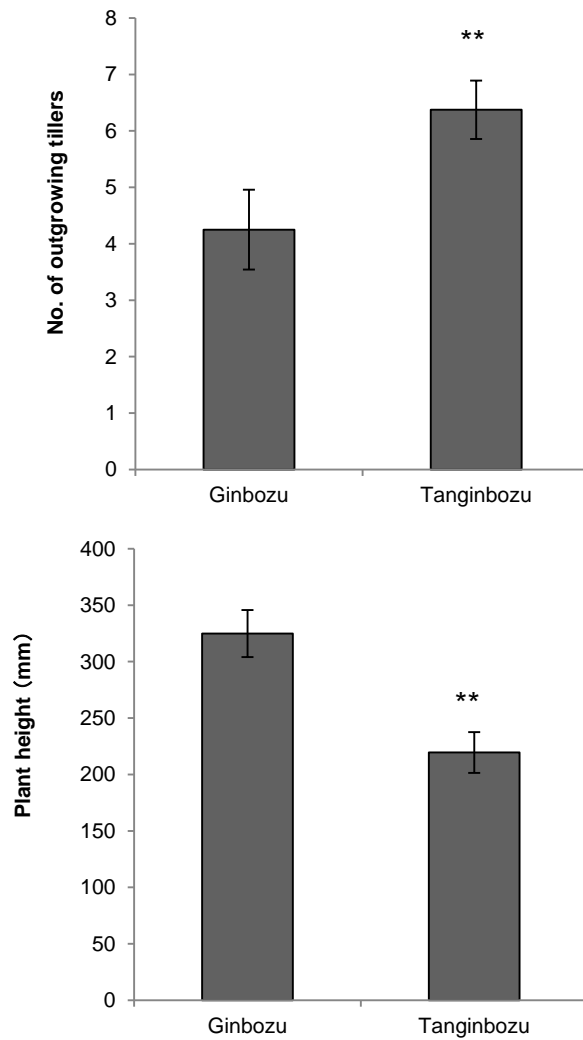

**Supplemental Fig. 4**

**Tiller number and plant height of GA biosynthesis mutant (Tanginbozu).**

Columns marked with \*\* indicate significant differences (Student's *t*-test,  $P < 0.01$ ).
